# Supplementary material for: Clinical Application of the FoundationOne CDx Assay to Therapeutic Decision‐Making for Patients with Advanced Solid Tumors
Source: PubMed Central journal article supplement — Oncologist. 2021 Jan 6;26(4):e588–96. doi: 10.1002/onco.13639 (PMC8018334; doi:10.1002/onco.13639), 2021-01-06
Supplement: ONCO-26-e588-s001.pdf [file ONCO-26-e588-s001.pdf]

Supplemental Table for:  
 Clinical Application of the FoundationOne CDx Assay to Therapeutic Decision-Making for Patients with Advanced Solid Tumors  
 Masayuki Takeda et al.

**Supplementary Table S1.** Success rate of genome profiling and TMB according to tumor specimens

| Tissue source     | Success of genomic testing (n = 175) |              | Failure of genomic testing (n = 6) |          | Excluded tumors before processing for genomic profiling (n = 11) |
|-------------------|--------------------------------------|--------------|------------------------------------|----------|------------------------------------------------------------------|
|                   | Genome profiling                     | TMB          | Genome profiling                   | TMB      |                                                                  |
| Surgery           | 111/111 (100%)                       | 97/111 (87%) | 0/4 (0%)                           | 0/4 (0%) | 1                                                                |
| Biopsy/Cell block |                                      |              |                                    |          |                                                                  |
| ≥20% tumor cell   | 58/58 (100%)                         | 53/58 (91%)  | 0/1 (0%)                           | 0/1 (0%) | 4                                                                |
| <20% tumor cell   | 6/6 (100%)                           | 3/6 (50%)    | 0/1 (0%)                           | 0/1 (0%) | 6                                                                |

Abbreviations not defined in text: TMB, tumor mutation burden
