# Supplementary figures and images for: Clinical Application of the FoundationOne CDx Assay to Therapeutic Decision‐Making for Patients with Advanced Solid Tumors
Source: PubMed Central journal article supplement — Oncologist. 2021 Jan 6;26(4):e588–96. doi: 10.1002/onco.13639 (PMC8018334; doi:10.1002/onco.13639), 2021-01-06

# Supplementary Figure 1.

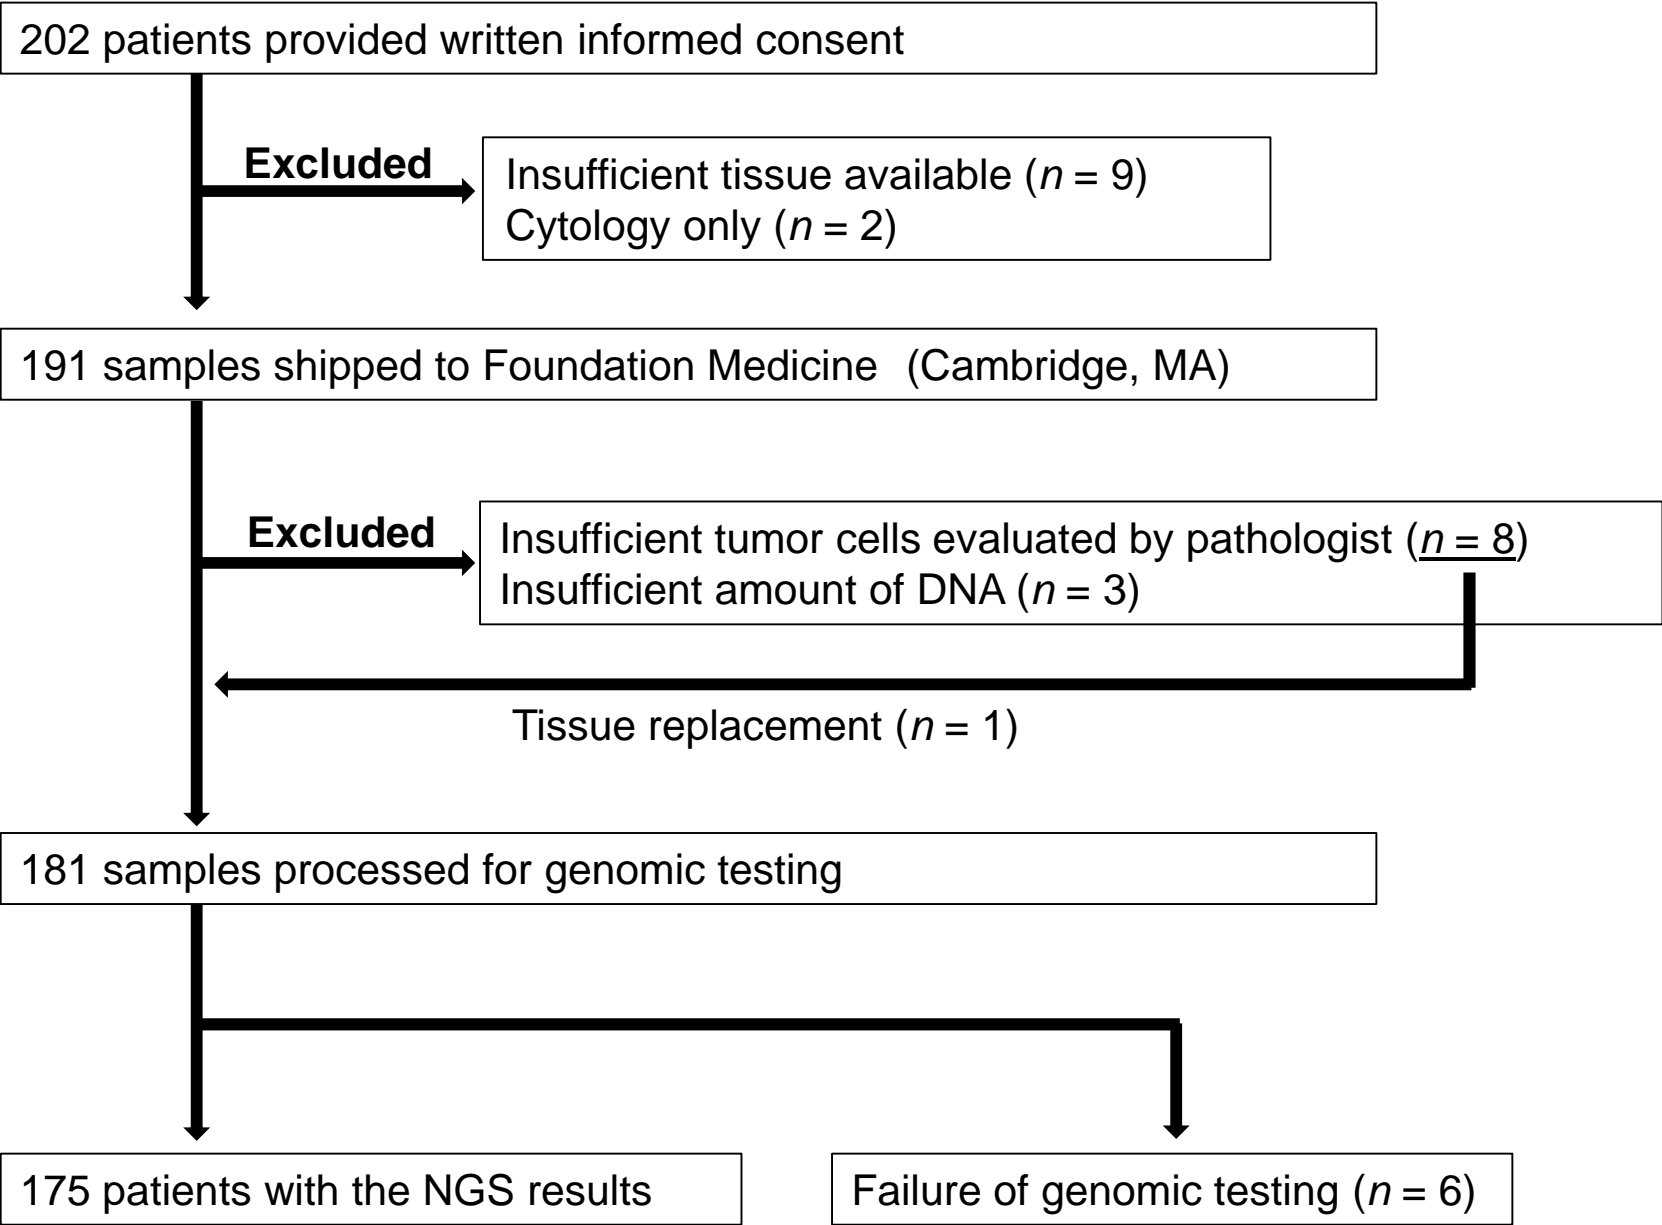

Supplement: ONCO-26-e588-s002.pdf [file ONCO-26-e588-s002.pdf]
